# Supplementary material for: The Facilitating Effect of Tartary Buckwheat Flavonoids and Lactobacillus plantarum on the Growth Performance, Nutrient Digestibility, Antioxidant Capacity, and Fecal Microbiota of Weaned Piglets
Source: MDPI journal article supplement (doi:10.3390/ani9110986), 2019-11-18
Supplement: s1 [file s1]

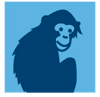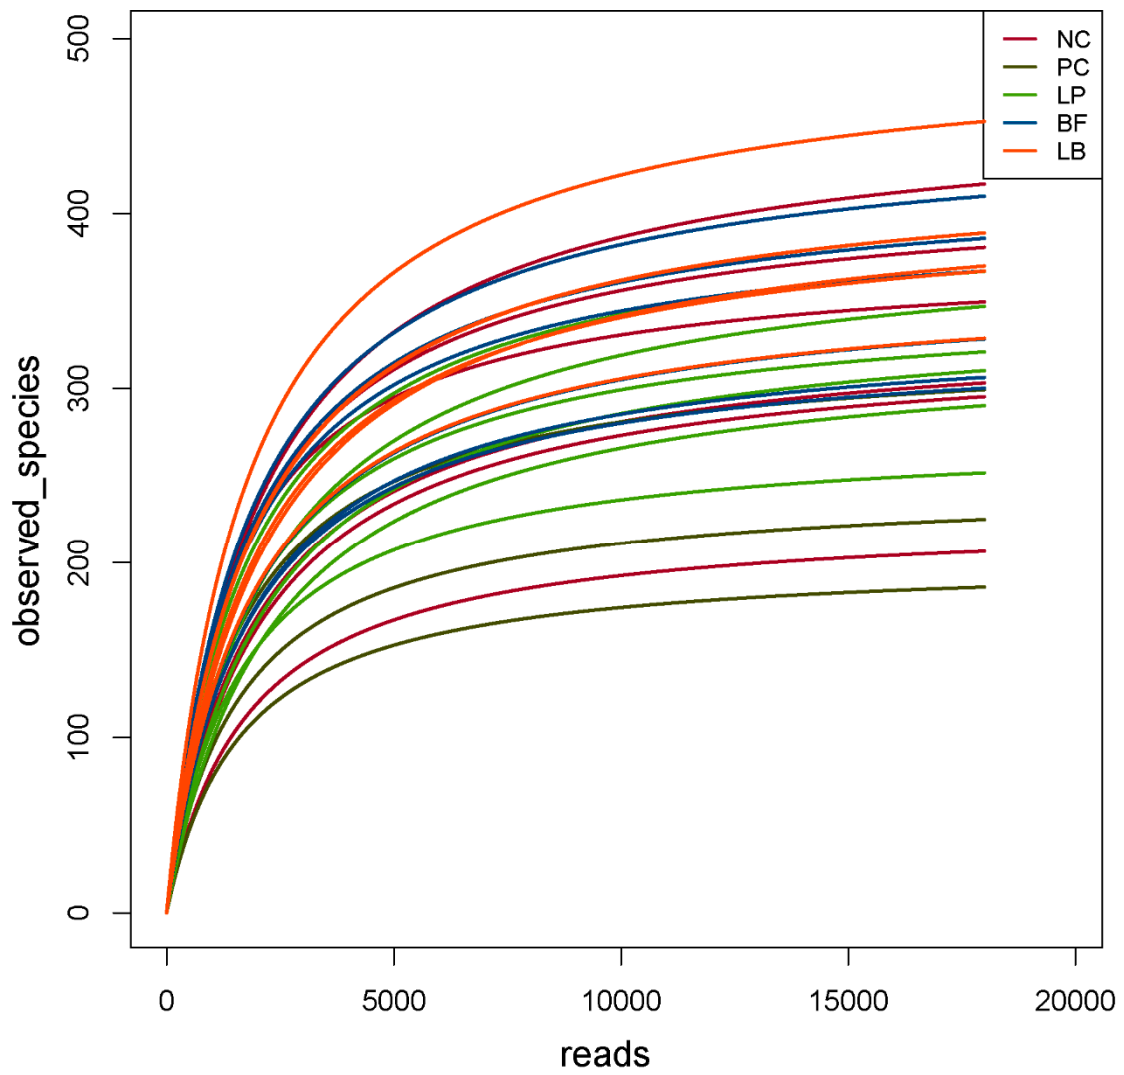

Figure S1. Rarefaction analysis of the different samples.
